# Supplementary material for: miRNA-218/FANCI is associated with metastasis and poor prognosis in lung adenocarcinoma: a bioinformatics analysis
Source: PubMed Central journal article supplement — Ann Transl Med. 2021 Aug;9(16):1298. doi: 10.21037/atm-21-3823 (PMC8422123; doi:10.21037/atm-21-3823), 2021-08
Supplement: atm-09-16-1298-supplementary.pdf [file atm-09-16-1298-supplementary.pdf]

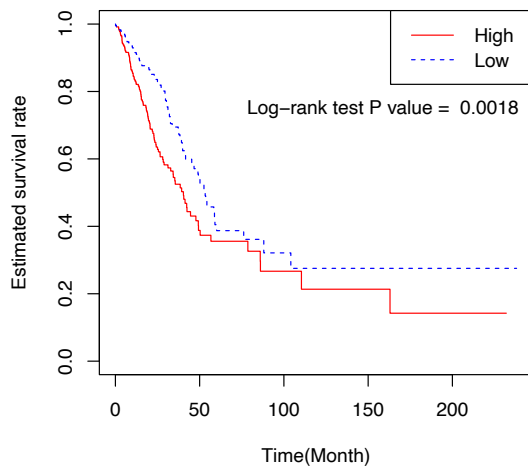

**Figure S1** The overall survival of the FANCI high-expression group and the low-expression group in LUAD based on TCGA. LUAD, lung adenocarcinoma.

**Table S1** The up/downregulated DEMs in GSE63805

| Up/down regulated | DEMs          | adj.P.Val   | P value  | logFC    |
|-------------------|---------------|-------------|----------|----------|
| Upregulated       | hsa-miR-21    | 5.64E-13    | 1.21E-15 | 2.04448  |
|                   | hsa-miR-96    | 6.41E-10    | 4.37E-12 | 1.89378  |
|                   | hsa-miR-135b  | 1.98E-08    | 1.89E-10 | 1.84985  |
|                   | hsa-miR-193b  | 9.22E-07    | 1.38E-08 | 1.0178   |
|                   | hsa-miR-183   | 1.19E-06    | 1.95E-08 | 1.42641  |
|                   | hsa-miR-1979  | 4.45E-06    | 7.88E-08 | 1.07789  |
|                   | hsa-miR-130b  | 3.30E-05    | 6.29E-07 | 1.21872  |
|                   | hsa-miR-31    | 4.20E-05    | 1.09E-06 | 1.4055   |
|                   | hsa-miR-9     | 5.34E-05    | 1.45E-06 | 2.20422  |
|                   | hsa-miR-429   | 2.77E-04    | 8.67E-06 | 1.12272  |
|                   | hsa-miR-141   | 5.49E-04    | 1.92E-05 | 1.0451   |
|                   | hsa-miR-891a  | 5.49E-04    | 2.02E-05 | 1.03588  |
|                   | hsa-miR-1246  | 9.02E-04    | 4.14E-05 | 1.7101   |
|                   | hsa-miR-210   | 9.34E-04    | 4.58E-05 | 1.02295  |
|                   | hsa-miR-1290  | 1.12E-02    | 7.17E-04 | 1.00711  |
|                   | hsa-miR-375   | 1.31E-02    | 9.16E-04 | 1.03906  |
|                   | Downregulated | hsa-miR-451 | 5.64E-13 | 1.54E-15 |
| hsa-miR-30a       |               | 2.25E-10    | 9.21E-13 | -1.58344 |
| hsa-miR-126       |               | 2.58E-10    | 1.41E-12 | -1.68116 |
| hsa-miR-520e      |               | 7.43E-09    | 6.07E-11 | -2.27211 |
| hsa-miR-30d       |               | 4.07E-08    | 4.44E-10 | -1.28665 |
| hsa-miR-30b       |               | 3.93E-07    | 4.82E-09 | -1.16183 |
| hsa-miR-144       |               | 7.28E-07    | 9.91E-09 | -1.70085 |
| hsa-miR-145       |               | 3.43E-05    | 7.25E-07 | -1.18285 |

DEM, differentially expressed microRNA.
